# Supplementary material
Source: HighWire-hosted journal article supplement (https://jnm.snmjournals.org/highwire/filestream/109613/field_highwire_adjunct_files/0/263984_Supplemental_Data.pdf)
Supplement: 263984_Supplemental_Data.pdf [file 263984_Supplemental_Data.pdf]

1  
 2 **Supplemental TABLE 1.** Comparison between  $^{68}\text{Ga}$ -DOTATOC and  $^{18}\text{F}$ -DOPA PET/CT for  
 3 primary SiNET and metastases (DR%): *per-region* analysis. Abbreviations: LN, lymph nodes; n  
 4 (%). \*: 37 (70%) patients underwent surgery after PET/CT.  
 5

|                           | $^{68}\text{Ga}$ -DOTATOC | $^{18}\text{F}$ -DOPA | Total | <i>p</i>     |
|---------------------------|---------------------------|-----------------------|-------|--------------|
| All primaries             | 46(96%)                   | 45(94%)               | 48    | 0.655        |
| Operated primaries        | 34(94%)                   | 34(94%)               | 37*   | 1.000        |
| All metastatic regions    | 117(93%)                  | 118(95%)              | 126   | 0.808        |
| Subdiaphragmatic LN       | 41(91%)                   | 44(98%)               | 45    | 0.180        |
| Mesenteric LN, all groups | 33(87%)                   | 38(100%)              | 38    | <b>0.025</b> |
| Mesenteric LN, group-1    | 10(83%)                   | 12(100%)              | 12    | 0.157        |
| Mesenteric LN, group-2    | 18(90%)                   | 20(100%)              | 20    | 0.157        |
| Mesenteric LN, group-3    | 5(83%)                    | 6(100%)               | 6     | 0.317        |
| Hepatic                   | 26(93%)                   | 28(100%)              | 28    | 0.346        |
| Peritoneal                | 12(86%)                   | 12(86%)               | 14    | 1.000        |
| Lung                      | 5(100%)                   | 5(100%)               | 5     | 1.000        |
| Bone                      | 15(100%)                  | 14(93%)               | 15    | 0.317        |
| Supradiaphragmatic LN     | 9(75%)                    | 12(100%)              | 12    | 0.083        |
| Left supraclavicular LN   | 7(100%)                   | 5(71%)                | 7     | 0.157        |

6
